# Supplementary material for: Altered MicroRNA Expression Is Associated with Tumor Grade, Molecular Background and Outcome in Childhood Infratentorial Ependymoma
Source: PLoS One. 2016 Jul 8;11(7):e0158464. doi: 10.1371/journal.pone.0158464 (PMC4938415; doi:10.1371/journal.pone.0158464)
Supplement: S2 Table — (XLSX) [file pone.0158464.s002.xlsx]

## Sheet: Sheet1
	Average Grade II	Average Grade III	FOLD III/II	Unadjusted p level	Benjamini-Hochberg adjusted p level
miR-30b-5p	2.62+/-0.26	-0.18+/-0.33	6.98	7.53185e-08	6.32676e-06
miR-29c-3p	1.94+/-0.49	-1.87+/-0.71	13.99	3.02604e-06	8.94811e-05
miR-19b-3p	4.02+/-0.70	-0.80+/-0.87	28.25	3.19575e-06	8.94811e-05
miR-27a-3p	2.92+/-0.65	-1.40+/-0.46	19.97	4.70422e-06	9.87886e-05
miR-29b-3p	5.38+/-0.78	0.92+/-0.69	22.06	7.93505e-06	0.000133309
miR-19a-3p	3.78+/-0.78	-0.98+/-0.46	27.16	1.58258e-05	0.000221561
miR-15a-5p	6.08+/-0.83	1.55+/-0.58	23.10	1.93241e-05	0.000231889
miR-130a-3p	4.16+/-0.52	1.45+/-0.33	6.54	3.38778e-05	0.000355717
miR-17-5p	8.40+/-0.58	5.40+/-0.78	8.00	4.97187e-05	0.000464041
miR-29a-3p	1.88+/-0.51	-1.35+/-0.98	9.38	0.000126963	0.000993387
miR-101-3p	4.96+/-0.96	-0.15+/-0.31	34.54	0.000130086	0.000993387
miR-144-3p	9.50+/-1.26	4.62+/-0.94	29.51	0.000153472	0.0010743
miR-16-5p	1.28+/-0.74	-1.55+/-0.44	7.11	0.000226959	0.00136808
miR-190a	6.64+/-0.73	3.93+/-0.77	6.53	0.000228013	0.00136808
miR-30c-5p	1.12+/-0.52	-0.82+/-0.26	3.83	0.000341993	0.00191484
miR-24-3p	0.42+/-0.45	-1.08+/-0.37	2.83	0.000364731	0.00191484
miR-125b-5p	-2.44+/-0.67	-4.58+/-0.31	4.42	0.00084105	0.00415578
miR-106b-5p	2.30+/-0.91	-0.20+/-0.46	5.66	0.00173127	0.00807926
miR-130b-3p	4.60+/-0.41	3.18+/-0.67	2.67	0.00227646	0.00951406
miR-18a-5p	6.92+/-1.13	4.00+/-0.57	7.57	0.00234982	0.00951406
miR-34-5p	3.48+/-1.29	0.28+/-1.07	9.17	0.00237852	0.00951406
miR-200a-3p	10.84+/-1.49	6.98+/-0.61	14.49	0.00271125	0.0101873
miR-149-5p	3.20+/-0.56	1.47+/-0.83	3.32	0.00284552	0.0101873
miR-20a-5p	1.94+/-1.08	-0.65+/-0.63	6.02	0.00291787	0.0101873
miR-425-5p	6.56+/-1.21	3.35+/-0.36	9.25	0.00303192	0.0101873
miR-17-3p	2.96+/-0.99	0.78+/-0.64	4.52	0.00441561	0.0142658
miR-328	5.64+/-0.35	4.47+/-0.65	2.26	0.0054428	0.0169331
miR-181a-5p	2.64+/-0.65	1.22+/-0.69	2.68	0.00699754	0.0209926
miR-451a	1.54+/-1.54	-1.42+/-1.09	7.76	0.00844993	0.0244757
miR-148a-3p	3.46+/-1.10	1.48+/-0.91	3.94	0.0129281	0.0361988
miR-153	4.42+/-1.46	1.97+/-0.41	5.48	0.0175534	0.0475642
miR-93-5p	0.86+/-0.61	-0.83+/-1.22	3.23	0.018583	0.0487804
miR-21-5p	6.14+/-1.06	4.03+/-1.41	4.31	0.0199774	0.0508515
miR-96-5p	12.82+/-1.24	10.95+/-1.06	3.66	0.0287106	0.0705581
miR-125a-5p	-1.00+/-0.39	-1.63+/-0.41	1.55	0.0293992	0.0705581
miR-184	7.88+/-1.25	10.10+/-1.67	0.21	0.0333572	0.0778334
miR-335-5p	6.70+/-0.45	4.88+/-1.60	3.52	0.037805	0.0852611
miR-107	6.62+/-0.99	5.30+/-0.62	2.50	0.0385705	0.0852611
miR-141-3p	12.12+/-1.71	9.88+/-0.54	4.71	0.0407141	0.087692
miR-9-5p	2.58+/-0.97	1.33+/-0.53	2.37	0.042283	0.0886388
miR-296-5p	7.28+/-0.68	4.90+/-2.17	5.21	0.0432642	0.0886388
miR-320a	-0.38+/-0.77	0.93+/-1.17	0.40	0.0536988	0.107398
miR146b-5p	4.00+/-1.16	2.48+/-1.25	2.86	0.0671258	0.131129
miR-185-5p	3.96+/-0.54	3.33+/-0.52	1.54	0.086141	0.164451
miR-486-5p	3.68+/-1.05	4.98+/-1.26	0.41	0.0943924	0.176199
miR-217	10.02+/-0.83	11.88+/-2.37	0.27	0.119285	0.217825
miR-137	11.82+/-0.99	10.02+/-2.34	3.49	0.13107	0.234254
miR-210	-0.76+/-1.05	-1.98+/-1.44	2.33	0.139281	0.243741
let-7b-5p	-1.72+/-0.94	-0.85+/-0.92	0.55	0.157719	0.270375
miR-15b-5p	2.00+/-0.85	1.17+/-1.19	1.78	0.209471	0.351911
miR-182-5p	9.88+/-0.95	10.73+/-1.17	0.55	0.214111	0.352654
miR-23b-3p	-0.26+/-0.64	0.48+/-1.24	0.60	0.23817	0.375348
miR-10b-5p	6.92+/-3.19	4.52+/-3.11	5.29	0.241408	0.375348
miR-9-3p	-0.70+/-1.84	-1.85+/-0.61	2.22	0.241523	0.375348
miR-127-5p	8.78+/-2.13	7.43+/-1.02	2.54	0.245763	0.375348
miR-324-5p	4.06+/-1.43	3.08+/-1.12	1.97	0.251293	0.37694
miR-31-5p	4.50+/-2.84	2.13+/-3.68	5.16	0.259742	0.382778
miR-191-5p	1.54+/-0.36	1.25+/-0.48	1.22	0.28521	0.413063
miR-23a-3p	0.44+/-1.52	-0.27+/-0.34	1.63	0.362675	0.516351
miR-187-3p	7.78+/-1.14	8.75+/-2.20	0.51	0.376604	0.527246
miR-323a-5p	1.38+/-1.79	2.82+/-3.33	0.37	0.389772	0.536735
miR-181b-5p	1.18+/-1.24	1.75+/-1.03	0.67	0.438249	0.593757
miR-183-5p	11.10+/-1.38	11.68+/-1.32	0.67	0.496193	0.653723
miR-25-3p	1.78+/-0.87	1.45+/-0.62	1.26	0.498074	0.653723
miR-7-5p	4.96+/-2.08	5.65+/-0.85	0.62	0.517891	0.669275
miR-146a-5p	4.74+/-0.67	4.38+/-1.15	1.28	0.539916	0.687166
miR-221-3p	3.38+/-0.83	3.67+/-0.78	0.82	0.573636	0.699635
miR-222-3p	4.76+/-1.08	4.38+/-1.05	1.30	0.574518	0.699635
miR-222-5p	11.66+/-1.34	12.35+/-2.49	0.62	0.574701	0.699635
miR-92a-3p	-4.10+/-0.58	-3.90+/-0.72	0.87	0.622936	0.747523
miR-128	3.10+/-2.49	2.53+/-0.42	1.48	0.640649	0.757951
miR-138-5p	7.24+/-2.73	6.68+/-1.55	1.47	0.699334	0.81338
miR-129-5p	5.30+/-2.22	5.82+/-2.17	0.70	0.706866	0.81338
miR-203a	9.42+/-0.78	9.20+/-1.35	1.16	0.743926	0.844457
miR-133b	11.96+/-2.11	11.57+/-2.30	1.31	0.774237	0.867146
miR-326	6.78+/-2.02	7.08+/-1.72	0.81	0.797783	0.881761
miR-132-3p	3.94+/-0.68	3.85+/-0.71	1.06	0.835836	0.911821
miR-216a-5p	9.64+/-2.02	9.90+/-2.41	0.84	0.850039	0.915426
miR-150-5p	3.70+/-0.64	3.63+/-1.00	1.05	0.896696	0.946958
miR-218-5p	2.30+/-1.25	2.38+/-0.81	0.94	0.901864	0.946958
miR-133a	11.12+/-2.25	11.00+/-2.11	1.09	0.929884	0.964324
miR-124-3p	4.76+/-4.46	4.62+/-2.61	1.10	0.951422	0.974628
miR-331-5p	9.20+/-2.00	9.22+/-1.72	0.99	0.98867	1
miR-26a-5p	-2.60+/-1.23	-2.60+/-0.58	1.00	1	1
